# Supplementary material
Source: publisher figshare collection journal article supplement (https://tandf.figshare.com/articles/dataset/_/5492617)
Supplement: Supplementary file 1 [file 2]

## Supplementary materials

### List of participating investigators and institutions

|                   |                                                     |                         |
|-------------------|-----------------------------------------------------|-------------------------|
| Yuri Ono          | Yuri Ono Clinic                                     | Sapporo-shi, Hokkaido   |
| Shin Aoki         | Aoki Clinic                                         | Sapporo-shi, Hokkaido   |
| Atsushi Hasegawa  | Hasegawa Medicine Clinic                            | Chitose-shi, Hokkaido   |
| Shin Furukawa     | Kushiro Red Cross Hospital                          | Kushiro-shi, Hokkaido   |
| Toshihide Oizumi  | Yamagata University Hospital                        | Yamagata-shi, Yamagata  |
| Hiroaki Seino     | Seino Internal Medicine Clinic                      | Koriyama-shi, Fukushima |
| Michio Nakagawa   | Matsumoto Nakagawa Hospital                         | Matsumoto-shi, Nagano   |
| Takahide Miyamoto | Miyamoto Medical Clinic                             | Matsumoto-shi, Nagano   |
| Keishi Yamauchi   | Aizawa Hospital                                     | Matsumoto-shi, Nagano   |
| Yoichi Koizumi    | Komoro Kosei General Hospital                       | Komoro-shi, Nagano      |
| Yoshimasa Aso     | Dokkyo Medical University Hospital                  | Shimotsuga-gun, Tochigi |
| Tadashi Okabe     | Okabe Clinic                                        | Chuo-ku, Tokyo          |
| Hitoshi Ishida    | Kyorin University Hospital                          | Mitaka-shi, Tokyo       |
| Atsushi Ohno      | Tokyo Medical University Hachioji<br>Medical Center | Hachioji-shi, Tokyo     |
| Noritaka Onoda    | Sayama General Clinic                               | Sayama-shi, Saitama     |
| Yasushi Iwaita    | Koukan Clinic                                       | Kawasaki-shi, Kanagawa  |

|                    |                                                               |                        |
|--------------------|---------------------------------------------------------------|------------------------|
| Mikiya Tokui       | Tokui Internal Medical Clinic                                 | Yokohama-shi, Kanagawa |
| Kiyokazu Matoba    | Matoba Internal Medicine Clinic                               | Ebina-shi, Kanagawa    |
| Satsuki Kawasaki   | Shonan Fujisawa Tokushukai Hospital                           | Fujisawa-shi, Kanagawa |
| Kazuhisa Matsumoto | Koshigaya Municipal Hospital                                  | Koshigaya-shi, Saitama |
| Akemi Inagaki      | Japanese Red Cross Nagoya Daini Hospital                      | Nagoya-shi, Aichi      |
| Hiroshi Sobajima   | Ogaki Municipal Hospital                                      | Ogaki-shi, Gifu        |
| Yasuro Kumeda      | Minamiosaka Hospital, Keigaku-Kai, Social Medical Corporation | Osaka-shi, Osaka       |
| Soichi Kurioka     | Medical Corporation Kyoujinkai Clinic Komatsu                 | Neyagawa-shi, Osaka    |
| Yasuhiro Kawai     | Misugikai Sato Hospital                                       | Hirakata-shi, Osaka    |
| Takaaki Yoshimasa  | Yoshimasa Diabetes & Endocrine Clinic                         | Kyoto-shi, Kyoto       |
| Shizuo Kajiyama    | Medical Corporation Keiseikai Kajiyama Clinic                 | Kyoto-shi, Kyoto       |
| Yukihiro Bando     | Fukui-ken Saiseikai Hospital                                  | Fukui-shi, Fukui       |
| Yukio Tanizawa     | Yamaguchi University Hospital                                 | Ube-shi, Yamaguchi     |
| Hiroyuki Daikuhara | Sakaide City Hospital                                         | Sakaide-shi, Kagawa    |

|                   |                                                       |                                 |
|-------------------|-------------------------------------------------------|---------------------------------|
| Norio Abiru       | Nagasaki University Hospital                          | Nagasaki-shi, Nagasaki          |
| Isao Shiroma      | Chibana Clinic                                        | Okinawa-shi, Okinawa            |
| Satoshi Soda      | Niigata City General Hospital                         | Niigata-shi, Niigata            |
| Tadasu Kasahara   | Johsai Hospital                                       | Suginami-ku, Tokyo              |
| Koichi Hirao      | H.E.C Science Clinic                                  | Yokohama-shi, Kanagawa          |
| Hiroyuki Ishii    | Medical Corporation Ishii Internal<br>Medicine Clinic | Kawaguchi-shi, Saitama          |
| Hiroki Ikeda      | Ikeda Hospital                                        | Amagasaki-shi, Hyogo            |
| Osamu Ebisui      | Ehime Prefectural Central Hospital                    | Matsuyama-shi, Ehime            |
| Katsuya Yamazaki  | Kawai Clinic                                          | Tsukuba-shi, Ibaraki            |
| Yoshio Kurihara   | Kurihara Diabetic Care Clinic                         | Sapporo-shi, Hokkaido           |
| Ichiro Tatsuno    | Toho University Sakura Medical<br>Center              | Sakura-shi, Chiba               |
| Kunihiko Nakamura | Tenjingawa Nakamura Clinic                            | Aki-gun, Hiroshima              |
| Toshie Araki      | Shigei Medical Research Hospital                      | Okayama-shi, Okayama            |
| Masahiro Kamimoto | Takeda General Hospital                               | Aizuwakamatsu-shi,<br>Fukushima |
| Shuichi Fukuda    | Wakakusa Clinic                                       | Shimotsuke-shi, Tochigi         |
| Kei Kotani        | Kotani Diabetes Clinic                                | Kobe-shi, Hyogo                 |
| Tomomi Fujisawa   | Sakai Municipal Hospital                              | Sakai-shi, Osaka                |

|                   |                                              |                         |
|-------------------|----------------------------------------------|-------------------------|
| Osamu Tomonaga    | Tomonaga Clinic                              | Shinjuku-ku, Tokyo      |
| Ryohei Yoshimura  | Yoshimura Clinic                             | Kumamoto-shi, Kumamoto  |
| Yuhara Takamichi  | Namegata District General Hospital           | Namegata-shi, Ibaraki   |
| Yusuke Fujino     | New Tokyo Heart Clinic                       | Matsudo-shi, Chiba      |
| Tsunehiro Suzuki  | Shintomi Naika Clinic                        | Asahikawa-shi, Hokkaido |
| Toshiya Okamoto   | Okamoto Naika Clinic                         | Sapporo-shi, Hokkaido   |
| Hirohiko Kawakami | North Alps Medical Center Azumi Hospital     | Kitaazumi-gun, Nagano   |
| Kenichi Yamamoto  | Saga Memorial Hospital                       | Saga-shi, Saga          |
| Takayuki Higashi  | Higashi Diabetes and Cardiovascular Clinic   | Tamana-shi, Kumamoto    |
| Kazuo Ibaraki     | Japanese Red Cross Karatsu Hospital          | Karatsu-shi, Saga       |
| Arihiro Kiyosue   | Tokyo-Eki Center-building Clinic             | Chuo-ku, Tokyo          |
| Akira Imamura     | Moriya Keiyu Hospital                        | Moriya-shi, Ibaraki     |
| Katsumi Takai     | Shonan takai Clinic                          | Kamakura-shi, Kanagawa  |
| Kuninobu Takai    |                                              |                         |
| Yukari Shimizu    | Medical Corporation Fusa Shimizu Clinic Fusa | Saitama-shi, Saitama    |
| Motohiro Fujita   | Fujita Clinic                                | Kurashiki-shi, Okayama  |

Supplemental Table 1. Demographic and other baseline characteristics in the safety analysis set from the double-blind treatment period

| Characteristic                |                      | All patients<br>N = 232 | Saxagliptin<br>N = 117 | Placebo<br>N = 115 |
|-------------------------------|----------------------|-------------------------|------------------------|--------------------|
| Sex                           | Female               | 90 (38.8%)              | 45 (38.5%)             | 45 (39.1%)         |
|                               | Male                 | 142 (61.2%)             | 72 (61.5%)             | 70 (60.9%)         |
| Age (years)                   | Mean $\pm$ SD        | 63.6 $\pm$ 10.2         | 63.5 $\pm$ 10.3        | 63.7 $\pm$ 10.1    |
|                               | < 65                 | 118 (50.9%)             | 61 (52.1%)             | 57 (49.6%)         |
|                               | $\geq$ 65            | 114 (49.1%)             | 56 (47.9%)             | 58 (50.4%)         |
| Height (cm)                   | Mean $\pm$ SD        | 161.66 $\pm$ 9.38       | 161.67 $\pm$ 9.15      | 161.64 $\pm$ 9.65  |
| Weight (kg)                   | Mean $\pm$ SD        | 65.43 $\pm$ 13.26       | 64.28 $\pm$ 10.87      | 66.61 $\pm$ 15.27  |
| BMI (kg/m <sup>2</sup> )      | Mean $\pm$ SD        | 25.00 $\pm$ 4.08        | 24.60 $\pm$ 3.77       | 25.41 $\pm$ 4.35   |
| Type of insulin               | Long                 | 70 (30.2%)              | 35 (29.9%)             | 35 (30.4%)         |
|                               | Intermediate         | 1 (0.4%)                | 1 (0.9%)               | 0                  |
|                               | Premixed             | 161 (69.4%)             | 81 (69.2%)             | 80 (69.6%)         |
| Duration of diabetes (years)  | Mean $\pm$ SD        | 15.84 $\pm$ 8.99        | 16.01 $\pm$ 8.26       | 15.67 $\pm$ 9.71   |
| HbA1c (%)                     | Mean $\pm$ SD        | 8.32 $\pm$ 0.65         | 8.33 $\pm$ 0.68        | 8.31 $\pm$ 0.61    |
| FPG (mg/dL)                   | Mean $\pm$ SD        | 163.7 $\pm$ 38.6        | 166.3 $\pm$ 40.1       | 161.0 $\pm$ 37.0   |
| Creatinine clearance (mL/min) | Mean $\pm$ SD        | 92.46 $\pm$ 37.65       | 87.18 $\pm$ 28.01      | 97.83 $\pm$ 44.90  |
| OAD washout period            | Yes                  | 107 (46.1%)             | 55 (47.0%)             | 52 (45.2%)         |
| Daily insulin dose (IU)       | Mean $\pm$ SD        | 23.29 $\pm$ 8.91        | 22.86 $\pm$ 8.99       | 23.73 $\pm$ 8.85   |
| Complications                 | Any                  | 231 (99.6%)             | 117 (100.0%)           | 114 (99.1%)        |
|                               | Diabetic neuropathy  | 82 (35.3%)              | 42 (35.9%)             | 40 (34.8%)         |
|                               | Diabetic retinopathy | 112 (48.3%)             | 60 (51.3%)             | 52 (45.2%)         |

|                      |             |              |             |
|----------------------|-------------|--------------|-------------|
| Diabetic nephropathy | 95 (40.9%)  | 47 (40.2%)   | 48 (41.7%)  |
| Other                | 230 (99.1%) | 117 (100.0%) | 113 (98.3%) |

---

Data set: Safety analysis set during the double-blind period

SD, standard deviation; BMI, body mass index; HbA1c, hemoglobin A1c; FPG, fasting plasma glucose; OAD, oral antidiabetic drug

Supplemental Table 2. Subgroup analysis of the changes in HbA1c (%) from baseline to the end of the long-term treatment period

|                     |                      |               | Saxagliptin→saxagliptin<br>N = 113 | Placebo→saxagliptin<br>N = 100 |
|---------------------|----------------------|---------------|------------------------------------|--------------------------------|
| Age                 |                      |               |                                    |                                |
| <65 years           | Baseline*            | n             | 61                                 | 47                             |
|                     |                      | Mean (95% CI) | 8.36 (8.20, 8.53)                  | 8.72 (8.51, 8.93)              |
|                     | Change from baseline | n             | 51                                 | 45                             |
|                     |                      | Mean (95% CI) | −0.52 (−0.73, −0.32)               | −0.74 (−0.95, −0.52)           |
|                     |                      |               |                                    |                                |
|                     |                      |               |                                    |                                |
| ≥65 years           | Baseline*            | n             | 52                                 | 53                             |
|                     |                      | Mean (95% CI) | 8.25 (8.04, 8.45)                  | 8.19 (8.01, 8.38)              |
|                     | Change from baseline | n             | 45                                 | 44                             |
|                     |                      | Mean (95% CI) | −0.72 (−0.93, −0.50)               | −0.70 (−0.90, −0.50)           |
|                     |                      |               |                                    |                                |
|                     |                      |               |                                    |                                |
| HbA1c (%)           |                      |               |                                    |                                |
| <8.0                | Baseline*            | n             | 46                                 | 27                             |
|                     |                      | Mean (95% CI) | 7.66 (7.60, 7.71)                  | 7.50 (7.38, 7.63)              |
|                     | Change from baseline | n             | 37                                 | 24                             |
|                     |                      | Mean (95% CI) | −0.47 (−0.66, −0.28)               | −0.49 (−0.75, −0.24)           |
|                     |                      |               |                                    |                                |
|                     |                      |               |                                    |                                |
| ≥8.0                | Baseline*            | n             | 67                                 | 73                             |
|                     |                      | Mean (95% CI) | 8.76 (8.63, 8.88)                  | 8.79 (8.66, 8.91)              |
|                     | Change from baseline | n             | 59                                 | 65                             |
|                     |                      | Mean (95% CI) | −0.70 (−0.91, −0.50)               | −0.80 (−0.97, −0.63)           |
|                     |                      |               |                                    |                                |
|                     |                      |               |                                    |                                |
| Insulin type        |                      |               |                                    |                                |
| Long-acting         | Baseline*            | n             | 34                                 | 33                             |
|                     |                      | Mean (95% CI) | 8.49 (8.24, 8.74)                  | 8.71 (8.46, 8.97)              |
|                     | Change from baseline | n             | 29                                 | 30                             |
|                     |                      | Mean (95% CI) | −0.59 (−0.89, −0.28)               | −0.78 (−1.06, −0.50)           |
|                     |                      |               |                                    |                                |
|                     |                      |               |                                    |                                |
| Intermediate-acting | Baseline*            | n             | 1                                  | 0                              |
|                     |                      | Mean          | 8.60                               |                                |
|                     | Change               | n             | 1                                  | 0                              |

|                           |                            |               |                      |                      |
|---------------------------|----------------------------|---------------|----------------------|----------------------|
|                           | from<br>baseline           | Mean (95% CI) | 0.80                 |                      |
| Premixed                  | Baseline*                  | n             | 78                   | 67                   |
|                           |                            | Mean (95% CI) | 8.23 (8.08, 8.38)    | 8.31 (8.13, 8.48)    |
|                           | Change<br>from<br>baseline | n             | 66                   | 59                   |
|                           |                            | Mean (95% CI) | -0.65 (-0.81, -0.48) | -0.68 (-0.86, -0.51) |
| FPG at baseline           |                            |               |                      |                      |
| <140 mg/dL                | Baseline*                  | n             | 29                   | 27                   |
|                           |                            | Mean (95% CI) | 8.10 (7.85, 8.34)    | 8.12 (7.80, 8.45)    |
|                           | Change<br>from<br>baseline | n             | 23                   | 24                   |
|                           |                            | Mean (95% CI) | -0.58 (-0.82, -0.35) | -0.73 (-0.97, -0.49) |
| ≥140 to <210<br>mg/dL     | Baseline*                  | n             | 71                   | 63                   |
|                           |                            | Mean          | 8.33 (8.18, 8.48)    | 8.52 (8.34, 8.69)    |
|                           | Change<br>from<br>baseline | n             | 68                   | 55                   |
|                           |                            | Mean (95% CI) | -0.64 (-0.83, -0.45) | -0.71 (-0.91, -0.51) |
| ≥210 mg/dL                | Baseline*                  | n             | 13                   | 10                   |
|                           |                            | Mean (95% CI) | 8.65 (8.14, 9.17)    | 8.81 (8.35, 9.27)    |
|                           | Change<br>from<br>baseline | n             | 5                    | 10                   |
|                           |                            | Mean (95% CI) | -0.40 (-1.27, 0.47)  | -0.73 (-1.27, -0.19) |
| Fasting C-peptide         |                            |               |                      |                      |
| <1.0 ng/mL                | Baseline*                  | n             | 64                   | 50                   |
|                           |                            | Mean (95% CI) | 8.32 (8.15, 8.49)    | 8.39 (8.16, 8.63)    |
|                           | Change<br>from<br>baseline | n             | 58                   | 43                   |
|                           |                            | Mean(95% CI)  | -0.66 (-0.85, -0.47) | -0.61 (-0.79, -0.43) |
| ≥ 1.0 ng/mL               | Baseline*                  | n             | 49                   | 50                   |
|                           |                            | Mean (95% CI) | 8.30 (8.09, 8.50)    | 8.49 (8.30, 8.67)    |
|                           | Change<br>from<br>baseline | n             | 38                   | 46                   |
|                           |                            | Mean (95% CI) | -0.54 (-0.78, -0.31) | -0.82 (-1.04, -0.59) |
| Daily insulin dose        |                            |               |                      |                      |
| <23.06 units <sup>†</sup> | Baseline*                  | n             | 56                   | 54                   |
|                           |                            | Mean (95% CI) | 8.35 (8.17, 8.53)    | 8.45 (8.24, 8.65)    |



|              |           |               |                      |                      |
|--------------|-----------|---------------|----------------------|----------------------|
| ≥23.06 units | Change    | n             | 49                   | 48                   |
|              | from      | Mean (95% CI) | -0.76 (-0.98, -0.53) | -0.88 (-1.06, -0.69) |
|              | baseline  |               |                      |                      |
|              | Baseline* | n             | 57                   | 46                   |
|              |           | Mean (95% CI) | 8.27 (8.09, 8.45)    | 8.43 (8.21, 8.65)    |
|              | Change    | n             | 47                   | 41                   |
|              | from      | Mean (95% CI) | -0.46 (-0.64, -0.28) | -0.53 (-0.75, -0.31) |
|              | baseline  |               |                      |                      |

---

Data set: Full analysis set during the long-term period

HbA1c, hemoglobin A1c; FPG, fasting plasma glucose; CI, confidence interval

\*Baseline was defined as the start of saxagliptin: Week 0 in the saxagliptin→saxagliptin group;

Week 16 in the placebo→saxagliptin group.

†Indicates the average daily insulin dose

Supplemental Table 3. Proportion of patients with therapeutic glycemic response

| n (%)                                                                             | Saxagliptin<br>N = 113 | Placebo<br>N = 115 |
|-----------------------------------------------------------------------------------|------------------------|--------------------|
| Double-blind period                                                               |                        |                    |
| Age <65                                                                           |                        |                    |
| HbA1c <7.0% at Baseline                                                           | 0/61 (0.0%)            | 0/57 (0.0%)        |
| HbA1c <7.0% at Week 16                                                            | 10/57 (17.5%)          | 0/49 (0.0%)        |
| HbA1c <7.0% with no hypoglycemic event <sup>†</sup> during 4 weeks before Week 16 | 9/57 (15.8%)           | 0/49 (0.0%)        |
| Age ≥65                                                                           |                        |                    |
| HbA1c <7.0% at Baseline                                                           | 0/52 (0.0%)            | 0/58 (0.0%)        |
| HbA1c <7.0% at Week 16                                                            | 12/48 (25.0%)          | 1/55 (1.8%)        |
| HbA1c <7.0% with no hypoglycemic event <sup>†</sup> during 4 weeks before Week 16 | 12/48 (25.0%)          | 1/55 (1.8%)        |
| 65 ≤ Age < 75                                                                     |                        |                    |
| HbA1c <7.5% at Baseline                                                           | 3/39 (7.7%)            | 2/40 (5.0%)        |
| HbA1c <7.5% at Week 16                                                            | 24/37 (64.9%)          | 5/40 (12.5%)       |
| HbA1c <7.5% with no hypoglycemic event <sup>†</sup> during 4 weeks before Week 16 | 23/37 (62.2%)          | 5/40 (12.5%)       |
| Age ≥75                                                                           |                        |                    |
| HbA1c <8.0% at Baseline                                                           | 8/13 (61.5%)           | 7/18 (38.9%)       |
| HbA1c <8.0% at Week 16                                                            | 10/11 (90.9%)          | 8/15 (53.3%)       |
| HbA1c <8.0% with no hypoglycemic event <sup>†</sup> during 4 weeks before Week 16 | 10/11 (90.9%)          | 7/15 (46.7%)       |

event<sup>†</sup> during 4 weeks before Week 16

|                                                                                      | Saxagliptin→saxagliptin<br>N = 113 | Placebo→saxagliptin<br>N = 100 |
|--------------------------------------------------------------------------------------|------------------------------------|--------------------------------|
| Double-blind period and Open-label<br>extension period                               |                                    |                                |
| Age <65                                                                              |                                    |                                |
| HbA1c <7.0% at Baseline*                                                             | 0/61 (0.0%)                        | 0/47 (0.0%)                    |
| HbA1c <7.0% at Week 52                                                               | 7/51 (13.7%)                       | 5/45 (11.1%)                   |
| HbA1c <7.0% with no hypoglycemic<br>event <sup>†</sup> during 4 weeks before Week 52 | 7/51 (13.7%)                       | 4/45 (8.9%)                    |
| Age ≥65                                                                              |                                    |                                |
| HbA1c <7.0% at Baseline*                                                             | 0/52 (0.0%)                        | 1/53 (1.9%)                    |
| HbA1c <7.0% at Week 52                                                               | 9/45 (20.0%)                       | 9/44 (20.5%)                   |
| HbA1c <7.0% with no hypoglycemic<br>event <sup>†</sup> during 4 weeks before Week 52 | 8/45 (17.8%)                       | 9/44 (20.5%)                   |
| 65 ≤ Age < 75                                                                        |                                    |                                |
| HbA1c <7.5% at Baseline*                                                             | 3/39 (7.7%)                        | 5/39 (12.8%)                   |
| HbA1c <7.5% at Week 52                                                               | 22/35 (62.9%)                      | 19/33 (57.6%)                  |
| HbA1c <7.5% with no hypoglycemic<br>event <sup>†</sup> during 4 weeks before Week 52 | 21/35 (60.0%)                      | 19/33 (57.6%)                  |
| Age ≥75                                                                              |                                    |                                |
| HbA1c <8.0% at Baseline*                                                             | 8/13 (61.5%)                       | 8/14 (57.1%)                   |
| HbA1c <8.0% at Week 52                                                               | 7/10 (70.0%)                       | 7/11 (63.6%)                   |

|                                                                                   |              |              |
|-----------------------------------------------------------------------------------|--------------|--------------|
| HbA1c <8.0% with no hypoglycemic event <sup>†</sup> during 4 weeks before Week 52 | 7/10 (70.0%) | 6/11 (54.5%) |
|-----------------------------------------------------------------------------------|--------------|--------------|

---

Data set: Full analysis set during the double-blind period and full analysis set during the long-term period

Data are shown as n (%)

HbA1c, hemoglobin A1c

\*Baseline was defined as the start of saxagliptin: Week 0 in the saxagliptin→saxagliptin group; Week 16 in the placebo→saxagliptin group.

Supplemental Table 4. Meal tolerance test-related variables

| Variable                                  | Saxagliptin                 | Placebo                     | Difference vs<br>placebo <sup>†</sup> (95% CI) |
|-------------------------------------------|-----------------------------|-----------------------------|------------------------------------------------|
|                                           | N =113                      | N =115                      |                                                |
| <hr/>                                     |                             |                             |                                                |
| 120-min PPG (mg/dL)                       |                             |                             |                                                |
| n                                         | 103                         | 102                         |                                                |
| Baseline, mean (SE)                       | 263.3 (5.73)                | 250.3 (5.76)                |                                                |
| Week 16, mean (SE)                        | 215.8 (4.69)                | 256.4 (5.66)                |                                                |
| Adjusted change (95% CI)                  | -7.6 (-38.4, 23.2)          | 38.2 (6.5, 69.9)            | -45.8 (-58.5, -33.0)                           |
| PPG AUC <sub>0-120 min</sub> (mg·min/dL)  |                             |                             |                                                |
| n                                         | 103                         | 102                         |                                                |
| Baseline, mean (SE)                       | 28,025.5 (506.95)           | 26,894.7 (492.33)           |                                                |
| Week 16, mean (SE)                        | 23,056.6 (442.72)           | 27,439.0 (494.66)           |                                                |
| Adjusted change (95% CI)                  | -148.2 (-2899.5,<br>2603.2) | 47,63.0 (1924.4,<br>7601.6) | -4911.1 (-6049.7,<br>-3772.6)                  |
| 120-min postprandial C-peptide<br>(ng/mL) |                             |                             |                                                |
| n                                         | 103                         | 102                         |                                                |
| Baseline, mean (SE)                       | 2.47 (0.108)                | 2.51 (0.126)                |                                                |

|                                                |                               |                              |                            |
|------------------------------------------------|-------------------------------|------------------------------|----------------------------|
| Week 16, mean (SE)                             | 2.66 (0.129)                  | 2.60 (0.123)                 |                            |
| Adjusted change (95% CI)                       | 0.27 (-0.29, 0.82)            | 0.18 (-0.40, 0.75)           | 0.09 (-0.14, 0.32)         |
| C-peptide AUC <sub>0-120 min</sub> (ng·min/mL) |                               |                              |                            |
| n                                              | 103                           | 102                          |                            |
| Baseline, mean (SE)                            | 223.86 (9.777)                | 232.93 (11.606)              |                            |
| Week 16, mean (SE)                             | 231.32 (10.661)               | 242.79 (11.857)              |                            |
| Adjusted change (95% CI)                       | 23.12 (-20.27, 66.50)         | 26.92 (-17.66, 71.50)        | -3.80 (-21.59, 13.98)      |
| 120-min postprandial glucagon<br>(pg/mL)       |                               |                              |                            |
| n                                              | 103                           | 102                          |                            |
| Baseline, mean (SE)                            | 130.3 (2.41)                  | 130.6 (2.03)                 |                            |
| Week 16, mean (SE)                             | 121.1 (2.33)                  | 122.8 (2.30)                 |                            |
| Adjusted change (95% CI)                       | -14.5 (-27.4, -1.7)           | -13.0 (-26.2, 0.3)           | -1.6 (-6.9, 3.7)           |
| Glucagon AUC <sub>0-120 min</sub> (pg·min/mL)  |                               |                              |                            |
| n                                              | 103                           | 102                          |                            |
| Baseline, mean (SE)                            | 16,556.2 (291.49)             | 16,827.5 (288.21)            |                            |
| Week 16, mean (SE)                             | 14,865.3 (254.26)             | 15,536.0 (302.00)            |                            |
| Adjusted change (95% CI)                       | -2497.2 (-3952.8,<br>-1041.6) | -2016.2 (-3514.5,<br>-517.9) | -481.1 (-1080.0,<br>117.9) |

---

Data set: Full analysis set during the double-blind period

PPG, postprandial plasma glucose; CI, confidence interval; SE, standard error;  $AUC_{0-120 \text{ min}}$ , area under the concentration–time curve from 0 to 120 min

<sup>†</sup>Difference vs Placebo: Adjusted change from baseline for saxagliptin — Adjusted change from baseline for placebo

Supplemental Table 5. Meal tolerance test-related variables by age.

| Variable                              |               | Saxagliptin          | Placebo              | Difference vs placebo <sup>†</sup><br>(95% CI) |
|---------------------------------------|---------------|----------------------|----------------------|------------------------------------------------|
| <b>Age &lt;65 years</b>               |               | <b>N = 61</b>        | <b>N = 57</b>        |                                                |
| Preprandial plasma glucose<br>(mg/dL) |               |                      |                      |                                                |
| Baseline                              | n             | 61                   | 57                   |                                                |
|                                       | Mean (95% CI) | 172.8 (161.8, 183.8) | 166.8 (157.4, 176.3) |                                                |
| Week 16                               | n             | 55                   | 48                   |                                                |
|                                       | Mean (95% CI) | 151.4 (142.0, 160.9) | 166.2 (155.9, 176.6) | -24.8 (-40.0, -9.6)                            |
| 30-min PPG (mg/dL)                    |               |                      |                      |                                                |
| Baseline                              | n             | 61                   | 57                   |                                                |
|                                       | Mean (95% CI) | 222.5 (211.7, 233.4) | 215.5 (203.8, 227.3) |                                                |
| Week 16                               | n             | 55                   | 48                   |                                                |
|                                       | Mean (95% CI) | 187.5 (176.8, 198.1) | 214.7 (202.0, 227.5) | -37.6 (-55.8, -19.3)                           |
| 60-min PPG (mg/dL)                    |               |                      |                      |                                                |
| Baseline                              | n             | 61                   | 57                   |                                                |
|                                       | Mean (95% CI) | 262.3 (247.6, 276.9) | 254.7 (240.5, 268.9) |                                                |
| Week 16                               | n             | 55                   | 48                   |                                                |



|                                          |               |                               |                               |                            |
|------------------------------------------|---------------|-------------------------------|-------------------------------|----------------------------|
|                                          | Mean (95% CI) | 216.8 (203.1, 230.6)          | 255.3 (240.1, 270.6)          | -48.8 (-70.1, -27.5)       |
| 120-min PPG (mg/dL)                      |               |                               |                               |                            |
| Baseline                                 | n             | 61                            | 57                            |                            |
|                                          | Mean (95% CI) | 266.7 (249.5, 284.0)          | 249.4 (234.1, 264.7)          |                            |
| Week 16                                  | n             | 55                            | 48                            |                            |
|                                          | Mean (95% CI) | 224.2 (209.2, 239.2)          | 259.5 (240.7, 278.3)          | -56.1 (-82.3, -29.9)       |
| PPG AUC <sub>0-120 min</sub> (mg·min/dL) |               |                               |                               |                            |
| Baseline                                 | n             | 61                            | 57                            |                            |
|                                          | Mean (95% CI) | 29,072.2 (27,610.7, 30,533.7) | 27,911.6 (26,474.4, 29,348.7) |                            |
| Week 16                                  | n             | 55                            | 48                            |                            |
|                                          | Mean (95% CI) | 24,378.8 (23012.5, 25,745.1)  | 28,209.7 (26,605.8, 29,813.6) | -5377.6 (-7665.6, -3089.7) |
| Preprandial C-peptide (ng/mL)            |               |                               |                               |                            |
| Baseline                                 | n             | 61                            | 57                            |                            |
|                                          | Mean (95% CI) | 1.07 (0.92, 1.22)             | 1.13 (1.00, 1.27)             |                            |
| Week 16                                  | n             | 55                            | 48                            |                            |
|                                          | Mean (95% CI) | 1.03 (0.88, 1.19)             | 1.23 (1.06, 1.39)             | -0.10 (-0.26, 0.05)        |
| 30-min postprandial C-peptide (ng/mL)    |               |                               |                               |                            |

|          |               |                   |                   |                     |
|----------|---------------|-------------------|-------------------|---------------------|
| Baseline | n             | 61                | 57                |                     |
|          | Mean (95% CI) | 1.66 (1.45, 1.87) | 1.81 (1.60, 2.01) |                     |
| Week 16  | n             | 55                | 48                |                     |
|          | Mean (95% CI) | 1.56 (1.35, 1.77) | 1.91 (1.66, 2.15) | -0.10 (-0.32, 0.12) |

60-min postprandial C-peptide

(ng/mL)

|          |               |                   |                   |                     |
|----------|---------------|-------------------|-------------------|---------------------|
| Baseline | n             | 61                | 57                |                     |
|          | Mean (95% CI) | 2.05 (1.82, 2.29) | 2.42 (2.15, 2.68) |                     |
| Week 16  | n             | 55                | 48                |                     |
|          | Mean (95% CI) | 2.01 (1.76, 2.26) | 2.55 (2.24, 2.86) | -0.06 (-0.34, 0.22) |

120-min postprandial C-peptide

(ng/mL)

|          |               |                   |                   |                    |
|----------|---------------|-------------------|-------------------|--------------------|
| Baseline | n             | 61                | 57                |                    |
|          | Mean (95% CI) | 2.49 (2.20, 2.78) | 2.78 (2.43, 3.13) |                    |
| Week 16  | n             | 55                | 48                |                    |
|          | Mean (95% CI) | 2.57 (2.21, 2.93) | 2.87 (2.52, 3.22) | 0.08 (-0.30, 0.46) |

C-peptide AUC<sub>0-120 min</sub> (ng·min/mL)

|          |               |                         |                         |  |
|----------|---------------|-------------------------|-------------------------|--|
| Baseline | n             | 61                      | 57                      |  |
|          | Mean (95% CI) | 232.89 (206.11, 259.68) | 263.24 (234.75, 291.72) |  |
| Week 16  | n             | 55                      | 48                      |  |

|                                          |               |                         |                         |                       |
|------------------------------------------|---------------|-------------------------|-------------------------|-----------------------|
|                                          | Mean (95% CI) | 229.99 (201.52, 258.46) | 276.63 (244.27, 308.98) | -5.04 (-34.34, 24.26) |
| Preprandial glucagon (pg/mL)             |               |                         |                         |                       |
| Baseline                                 | n             | 61                      | 57                      |                       |
|                                          | Mean (95% CI) | 120.0 (114.9, 125.2)    | 123.9 (119.0, 128.8)    |                       |
| Week 16                                  | n             | 55                      | 48                      |                       |
|                                          | Mean (95%CI)  | 114.8 (110.7, 118.9)    | 117.0 (111.4, 122.6)    | 2.4 (-4.2, 9.0)       |
| 30-min postprandial glucagon<br>(pg/mL)  |               |                         |                         |                       |
| Baseline                                 | n             | 61                      | 57                      |                       |
|                                          | Mean (95% CI) | 145.3 (138.1, 152.6)    | 154.6 (145.1, 164.0)    |                       |
| Week 16                                  | n             | 55                      | 48                      |                       |
|                                          | Mean (95% CI) | 124.3 (118.3, 130.3)    | 142.9 (133.7, 152.1)    | -7.3 (-18.1, 3.5)     |
| 60-min postprandial glucagon<br>(pg/mL)  |               |                         |                         |                       |
| Baseline                                 | n             | 61                      | 57                      |                       |
|                                          | Mean (95% CI) | 141.9 (134.3, 149.4)    | 152.2 (142.6, 161.8)    |                       |
| Week 16                                  | n             | 55                      | 48                      |                       |
|                                          | Mean (95% CI) | 128.1 (121.0, 135.2)    | 139.2 (129.1, 149.3)    | 0.7 (-9.9, 11.4)      |
| 120-min postprandial glucagon<br>(pg/mL) |               |                         |                         |                       |

|                                               |               |                              |                               |                         |
|-----------------------------------------------|---------------|------------------------------|-------------------------------|-------------------------|
| Baseline                                      | n             | 61                           | 57                            |                         |
|                                               | Mean (95% CI) | 129.6 (123.1, 136.1)         | 132.0 (126.0, 138.0)          |                         |
| Week 16                                       | n             | 55                           | 48                            |                         |
|                                               | Mean (95% CI) | 120.1 (113.8, 126.5)         | 123.7 (116.8, 130.5)          | -0.6 (-9.4, 8.3)        |
| Glucagon AUC <sub>0-120 min</sub> (pg·min/mL) |               |                              |                               |                         |
| Baseline                                      | n             | 61                           | 57                            |                         |
|                                               | Mean (95% CI) | 16,432.9 (15661.2, 17,204.5) | 17,302.6 (16,401.9, 18,203.4) |                         |
| Week 16                                       | n             | 55                           | 48                            |                         |
|                                               | Mean (95% CI) | 14,819.2 (14133.2, 15,505.2) | 16,016.9 (15076.3, 16,957.4)  | -167.9 (-1187.4, 851.5) |
| <b>Age ≥65 years</b>                          |               | <b>N = 52</b>                | <b>N = 58</b>                 |                         |
| Preprandial plasma glucose (mg/dL)            |               |                              |                               |                         |
| Baseline                                      | n             | 52                           | 58                            |                         |
|                                               | Mean (95% CI) | 153.6 (144.5, 162.8)         | 152.8 (143.1, 162.5)          |                         |
| Week 16                                       | n             | 48                           | 54                            |                         |
|                                               | Mean (95% CI) | 133.4 (126.2, 140.5)         | 157.2 (146.8, 167.5)          | -24.5 (-36.9, -12.1)    |
| 30-min PPG (mg/dL)                            |               |                              |                               |                         |

|                                          |               |                               |                               |                            |
|------------------------------------------|---------------|-------------------------------|-------------------------------|----------------------------|
| Baseline                                 | n             | 52                            | 58                            |                            |
|                                          | Mean (95% CI) | 199.8 (188.2, 211.4)          | 199.1 (187.7, 210.5)          |                            |
| Week 16                                  | n             | 48                            | 54                            |                            |
|                                          | Mean (95% CI) | 166.0 (158.6, 173.4)          | 201.2 (190.7, 211.7)          | -35.2 (-49.7, -20.7)       |
| 60-min PPG (mg/dL)                       |               |                               |                               |                            |
| Baseline                                 | n             | 52                            | 58                            |                            |
|                                          | Mean (95% CI) | 241.7 (229.8, 253.6)          | 235.1 (222.7, 247.5)          |                            |
| Week 16                                  | n             | 48                            | 54                            |                            |
|                                          | Mean (95% CI) | 186.1 (176.4, 195.9)          | 238.9 (227.9, 249.9)          | -60.5 (-76.7, -44.4)       |
| 120-min PPG (mg/dL)                      |               |                               |                               |                            |
| Baseline                                 | n             | 52                            | 58                            |                            |
|                                          | Mean (95% CI) | 261.5 (248.4, 274.6)          | 254.8 (238.8, 270.7)          |                            |
| Week 16                                  | n             | 48                            | 54                            |                            |
|                                          | Mean (95% CI) | 206.1 (196.1, 216.2)          | 253.6 (240.0, 267.2)          | -53.4 (-72.0, -34.8)       |
| PPG AUC <sub>0-120 min</sub> (mg·min/dL) |               |                               |                               |                            |
| Baseline                                 | n             | 52                            | 58                            |                            |
|                                          | Mean (95% CI) | 27,020.2 (25,813.7, 28,226.7) | 26,488.2 (25,141.3, 27,835.1) |                            |
| Week 16                                  | n             | 48                            | 54                            |                            |
|                                          | Mean (95% CI) | 21,541.6 (20,619.8, 22,463.4) | 26,753.9 (25,548.9, 27,958.9) | -5749.5 (-7460.7, -4038.3) |

|                                          |               |                   |                   |                     |
|------------------------------------------|---------------|-------------------|-------------------|---------------------|
|                                          |               | 22,463.3)         | 27,958.9)         | -4038.3)            |
| Preprandial C-peptide (ng/mL)            |               |                   |                   |                     |
| Baseline                                 | n             | 52                | 58                |                     |
|                                          | Mean (95% CI) | 0.95 (0.80, 1.10) | 0.96 (0.79, 1.13) |                     |
| Week 16                                  | n             | 48                | 54                |                     |
|                                          | Mean (95% CI) | 1.01 (0.82, 1.20) | 0.95 (0.77, 1.14) | 0.05 (-0.10, 0.19)  |
| 30-min postprandial C-peptide<br>(ng/mL) |               |                   |                   |                     |
| Baseline                                 | n             | 52                | 58                |                     |
|                                          | Mean (95% CI) | 1.47 (1.28, 1.65) | 1.43 (1.17, 1.68) |                     |
| Week 16                                  | n             | 48                | 54                |                     |
|                                          | Mean (95% CI) | 1.56 (1.32, 1.81) | 1.46 (1.20, 1.73) | 0.04 (-0.14, 0.22)  |
| 60-min postprandial C-peptide<br>(ng/mL) |               |                   |                   |                     |
| Baseline                                 | n             | 52                | 58                |                     |
|                                          | Mean (95% CI) | 1.96 (1.72, 2.20) | 1.79 (1.51, 2.06) |                     |
| Week 16                                  | n             | 48                | 54                |                     |
|                                          | Mean (95% CI) | 1.96 (1.68, 2.25) | 1.86 (1.57, 2.16) | -0.10 (-0.31, 0.10) |
| 120-min postprandial C-peptide           |               |                   |                   |                     |

(ng/mL)

|          |               |                   |                   |                    |
|----------|---------------|-------------------|-------------------|--------------------|
| Baseline | n             | 52                | 58                |                    |
|          | Mean (95% CI) | 2.52 (2.24, 2.81) | 2.27 (1.97, 2.57) |                    |
| Week 16  | n             | 48                | 54                |                    |
|          | Mean (95% CI) | 2.75 (2.37, 3.13) | 2.35 (2.02, 2.69) | 0.12 (-0.16, 0.40) |

C-peptide AUC<sub>0-120 min</sub> (ng·min/mL)

|          |               |                         |                         |                      |
|----------|---------------|-------------------------|-------------------------|----------------------|
| Baseline | n             | 52                      | 58                      |                      |
|          | Mean (95% CI) | 222.09 (196.41, 247.76) | 205.66 (175.34, 235.97) |                      |
| Week 16  | n             | 48                      | 54                      |                      |
|          | Mean (95% CI) | 232.84 (200.17, 265.51) | 212.72 (180.01, 245.43) | 0.78 (-20.73, 22.29) |

Preprandial glucagon (pg/mL)

|          |               |                      |                      |                 |
|----------|---------------|----------------------|----------------------|-----------------|
| Baseline | n             | 52                   | 58                   |                 |
|          | Mean (95% CI) | 124.3 (118.0, 130.5) | 120.9 (116.4, 125.3) |                 |
| Week 16  | n             | 48                   | 54                   |                 |
|          | Mean (95% CI) | 118.1 (111.8, 124.5) | 112.7 (107.4, 118.0) | 1.6 (-6.4, 9.7) |

30-min postprandial glucagon

(pg/mL)

|          |               |                      |                      |  |
|----------|---------------|----------------------|----------------------|--|
| Baseline | n             | 52                   | 58                   |  |
|          | Mean (95% CI) | 145.5 (138.2, 152.7) | 143.7 (138.3, 149.1) |  |
| Week 16  | n             | 48                   | 54                   |  |

|                                               |               |                               |                               |                         |
|-----------------------------------------------|---------------|-------------------------------|-------------------------------|-------------------------|
|                                               | Mean (95% CI) | 127.4 (120.5, 134.3)          | 132.0 (124.8, 139.2)          | -7.6 (-16.2, 1.0)       |
| 60-min postprandial glucagon                  |               |                               |                               |                         |
| (pg/mL)                                       |               |                               |                               |                         |
| Baseline                                      | n             | 52                            | 58                            |                         |
|                                               | Mean (95% CI) | 145.1 (138.0, 152.3)          | 140.9 (135.5, 146.4)          |                         |
| Week 16                                       | n             | 48                            | 54                            |                         |
|                                               | Mean (95% CI) | 125.8 (119.0, 132.5)          | 128.8 (121.4, 136.2)          | -8.3 (-16.8, 0.3)       |
| 120-min postprandial glucagon                 |               |                               |                               |                         |
| (pg/mL)                                       |               |                               |                               |                         |
| Baseline                                      | n             | 52                            | 58                            |                         |
|                                               | Mean (95%CI)  | 131.5 (125.3, 137.6)          | 129.8 (125.4, 134.2)          |                         |
| Week 16                                       | n             | 48                            | 54                            |                         |
|                                               | Mean (95% CI) | 122.2 (115.2, 129.2)          | 122.1 (115.8, 128.4)          | -2.3 (-10.0, 5.5)       |
| Glucagon AUC <sub>0-120 min</sub> (pg·min/mL) |               |                               |                               |                         |
| Baseline                                      | n             | 52                            | 58                            |                         |
|                                               | Mean (95% CI) | 16,702.5 (15,938.4, 17,466.6) | 16,359.8 (15,832.5, 16,887.2) |                         |
| Week 16                                       | n             | 48                            | 54                            |                         |
|                                               | Mean (95% CI) | 14,918.1 (14,147.2, 15,689.0) | 15,108.6 (14,335.2, 15,882.0) | -643.5 (-1523.1, 236.1) |

---



Data set: Full analysis set during the double-blind period

PPG, postprandial plasma glucose; CI, confidence interval; SE, standard error;  $AUC_{0-120 \text{ min}}$ , area under the concentration–time curve from 0 to 120 min

<sup>†</sup>Difference vs Placebo: Mean change for saxagliptin – Mean change for placebo

Supplemental Table 6. Meal tolerance test-related variables by insulin type.

| Variable                                    |               | Saxagliptin          | Placebo              | Difference vs placebo <sup>†</sup> (95% CI) |
|---------------------------------------------|---------------|----------------------|----------------------|---------------------------------------------|
| <b>Premixed/Intermediate-acting insulin</b> |               | <b>N = 79</b>        | <b>N = 80</b>        |                                             |
| Preprandial plasma glucose (mg/dL)          |               |                      |                      |                                             |
| Baseline                                    | n             | 79                   | 80                   |                                             |
|                                             | Mean (95% CI) | 163.9 (156.4, 171.5) | 166.1 (158.1, 174.1) |                                             |
| Week 16                                     | n             | 72                   | 68                   |                                             |
|                                             | Mean (95% CI) | 144.7 (138.0, 151.4) | 164.4 (155.3, 173.5) | -21.0 (-32.9, -9.0)                         |
| 30-min PPG (mg/dL)                          |               |                      |                      |                                             |
| Baseline                                    | n             | 79                   | 80                   |                                             |
|                                             | Mean (95% CI) | 208.5 (198.6, 218.5) | 210.0 (199.7, 220.3) |                                             |
| Week 16                                     | n             | 72                   | 68                   |                                             |
|                                             | Mean (95% CI) | 175.5 (167.5, 183.5) | 206.1 (196.5, 215.6) | -31.4 (-45.8, -17.0)                        |
| 60-min PPG (mg/dL)                          |               |                      |                      |                                             |
| Baseline                                    | n             | 79                   | 80                   |                                             |
|                                             | Mean (95% CI) | 241.0 (229.4, 252.5) | 241.6 (229.9, 253.3) |                                             |
| Week 16                                     | n             | 72                   | 68                   |                                             |
|                                             | Mean (95% CI) | 193.1 (182.6, 203.6) | 238.1 (226.9, 249.4) | -48.8 (-65.7, -32.0)                        |
| 120-min PPG (mg/dL)                         |               |                      |                      |                                             |

|                                          |               |                               |                               |                            |
|------------------------------------------|---------------|-------------------------------|-------------------------------|----------------------------|
| Baseline                                 | n             | 79                            | 80                            |                            |
|                                          | Mean (95% CI) | 250.4 (238.3, 262.5)          | 251.9 (238.3, 265.5)          |                            |
| Week 16                                  | n             | 72                            | 68                            |                            |
|                                          | Mean (95% CI) | 202.4 (192.4, 212.5)          | 251.4 (236.9, 266.0)          | -50.6 (-70.9, -30.2)       |
| PPG AUC <sub>0-120 min</sub> (mg·min/dL) |               |                               |                               |                            |
| Baseline                                 | n             | 79                            | 80                            |                            |
|                                          | Mean (95% CI) | 27,071.2 (25,936.5, 28,205.9) | 27,221.4 (26,001.1, 28,441.8) |                            |
| Week 16                                  | n             | 72                            | 68                            |                            |
|                                          | Mean (95% CI) | 22,197.9 (21,195.5, 23,200.4) | 26,908.0 (25,700.1, 28,115.9) | -4969.8 (-6780.8, -3158.9) |
| Preprandial C-peptide (ng/mL)            |               |                               |                               |                            |
| Baseline                                 | n             | 79                            | 80                            |                            |
|                                          | Mean (95% CI) | 1.05 (0.93, 1.18)             | 1.05 (0.92, 1.18)             |                            |
| Week 16                                  | n             | 72                            | 68                            |                            |
|                                          | Mean (95% CI) | 1.08 (0.93, 1.23)             | 1.07 (0.91, 1.23)             | -0.02 (-0.14, 0.10)        |
| 30-min postprandial C-peptide (ng/mL)    |               |                               |                               |                            |
| Baseline                                 | n             | 79                            | 80                            |                            |
|                                          | Mean (95% CI) | 1.61 (1.44, 1.79)             | 1.53 (1.34, 1.73)             |                            |
| Week 16                                  | n             | 72                            | 68                            |                            |

|                                                |               |                         |                         |                       |
|------------------------------------------------|---------------|-------------------------|-------------------------|-----------------------|
|                                                | Mean (95% CI) | 1.65 (1.46, 1.84)       | 1.58 (1.35, 1.81)       | -0.01 (-0.18, 0.15)   |
| 60-min postprandial C-peptide (ng/mL)          |               |                         |                         |                       |
| Baseline                                       | n             | 79                      | 80                      |                       |
|                                                | Mean (95% CI) | 2.06 (1.86, 2.26)       | 1.93 (1.71, 2.15)       |                       |
| Week 16                                        | n             | 72                      | 68                      |                       |
|                                                | Mean (95% CI) | 2.03 (1.81, 2.25)       | 1.98 (1.73, 2.24)       | -0.11 (-0.30, 0.09)   |
| 120-min postprandial C-peptide (ng/mL)         |               |                         |                         |                       |
| Baseline                                       | n             | 79                      | 80                      |                       |
|                                                | Mean (95% CI) | 2.43 (2.19, 2.67)       | 2.28 (2.02, 2.54)       |                       |
| Week 16                                        | n             | 72                      | 68                      |                       |
|                                                | Mean (95% CI) | 2.54 (2.25, 2.83)       | 2.35 (2.06, 2.65)       | 0.00 (-0.25, 0.25)    |
| C-peptide AUC <sub>0-120 min</sub> (ng·min/mL) |               |                         |                         |                       |
| Baseline                                       | n             | 79                      | 80                      |                       |
|                                                | Mean (95% CI) | 229.77 (207.33, 252.20) | 217.29 (192.89, 241.69) |                       |
| Week 16                                        | n             | 72                      | 68                      |                       |
|                                                | Mean (95% CI) | 233.25 (208.30, 258.20) | 223.30 (194.75, 251.85) | -5.38 (-25.14, 14.38) |
| Preprandial glucagon (pg/mL)                   |               |                         |                         |                       |
| Baseline                                       | n             | 79                      | 80                      |                       |

|                                               |               |                      |                      |                   |
|-----------------------------------------------|---------------|----------------------|----------------------|-------------------|
|                                               | Mean (95% CI) | 123.6 (118.6, 128.6) | 123.0 (119.4, 126.6) |                   |
| Week 16                                       | n             | 72                   | 68                   |                   |
|                                               | Mean (95% CI) | 117.4 (112.8, 122.0) | 115.7 (111.3, 120.1) | 0.7 (−5.6, 7.0)   |
| 30-min postprandial glucagon (pg/mL)          |               |                      |                      |                   |
| Baseline                                      | n             | 79                   | 80                   |                   |
|                                               | Mean (95% CI) | 145.4 (139.1, 151.6) | 146.7 (141.0, 152.4) |                   |
| Week 16                                       | n             | 72                   | 68                   |                   |
|                                               | Mean (95% CI) | 126.5 (120.8, 132.2) | 134.8 (128.3, 141.3) | −7.3 (−15.5, 0.8) |
| 60-min postprandial glucagon (pg/mL)          |               |                      |                      |                   |
| Baseline                                      | n             | 79                   | 80                   |                   |
|                                               | Mean (95% CI) | 143.7 (137.4, 150.0) | 142.8 (137.5, 148.0) |                   |
| Week 16                                       | n             | 72                   | 68                   |                   |
|                                               | Mean (95% CI) | 128.3 (122.1, 134.5) | 131.0 (125.0, 137.1) | −5.0 (−12.9, 3.0) |
| 120-min postprandial glucagon (pg/mL)         |               |                      |                      |                   |
| Baseline                                      | n             | 79                   | 80                   |                   |
|                                               | Mean (95% CI) | 130.7 (125.2, 136.1) | 130.5 (126.7, 134.3) |                   |
| Week 16                                       | n             | 72                   | 68                   |                   |
|                                               | Mean (95% CI) | 123.2 (117.2, 129.3) | 123.4 (118.2, 128.7) | −0.8 (−7.6, 6.0)  |
| Glucagon AUC <sub>0–120 min</sub> (pg·min/mL) |               |                      |                      |                   |

|                                    |               |                                |                               |                         |
|------------------------------------|---------------|--------------------------------|-------------------------------|-------------------------|
| Baseline                           | n             | 79                             | 80                            |                         |
|                                    | Mean (95% CI) | 16,601.6 (15,938.8, 17,264.4)  | 16,583.1 (16,075.0, 17,091.2) |                         |
| Week 16                            | n             | 72                             | 68                            |                         |
|                                    | Mean (95% CI) | 15,024.6 (14,373.7, 15,675.5)) | 15,378.5 (14,738.2, 16,018.9) | -457.5 (-1240.2, 325.2) |
| <b>Long-acting insulin</b>         |               | <b>N = 34</b>                  | <b>N = 35</b>                 |                         |
| Preprandial plasma glucose (mg/dL) |               |                                |                               |                         |
| Baseline                           | n             | 34                             | 35                            |                         |
|                                    | Mean (95% CI) | 164.1 (146.0, 182.1)           | 145.3 (133.3, 157.2)          |                         |
| Week 16                            | n             | 31                             | 34                            |                         |
|                                    | Mean (95% CI) | 139.2 (125.1, 153.2)           | 155.5 (143.3, 167.7)          | -32.5 (-49.4, -15.6)    |
| 30-min PPG (mg/dL)                 |               |                                |                               |                         |
| Baseline                           | n             | 34                             | 35                            |                         |
|                                    | Mean (95% CI) | 220.3 (206.2, 234.5)           | 200.9 (187.0, 214.7)          |                         |
| Week 16                            | n             | 31                             | 34                            |                         |
|                                    | Mean (95% CI) | 182.0 (168.1, 195.8)           | 210.6 (194.6, 226.5)          | -47.0 (-66.4, -27.6)    |
| 60-min PPG (mg/dL)                 |               |                                |                               |                         |
| Baseline                           | n             | 34                             | 35                            |                         |

|                                          |               |                               |                               |                            |
|------------------------------------------|---------------|-------------------------------|-------------------------------|----------------------------|
|                                          | Mean (95% CI) | 280.3 (266.0, 294.6)          | 252.2 (235.6, 268.8)          |                            |
| Week 16                                  | n             | 31                            | 34                            |                            |
|                                          | Mean (95% CI) | 224.5 (208.8, 240.1)          | 263.7 (248.4, 278.9)          | -65.2 (-86.4, -44.1)       |
| 120-min PPG (mg/dL)                      |               |                               |                               |                            |
| Baseline                                 | n             | 34                            | 35                            |                            |
|                                          | Mean (95% CI) | 296.7 (276.6, 316.7)          | 252.6 (233.8, 271.4)          |                            |
| Week 16                                  | n             | 31                            | 34                            |                            |
|                                          | Mean (95% CI) | 246.8 (230.8, 262.8)          | 266.2 (248.7, 283.7)          | -59.3 (-85.6, -33.0)       |
| PPG AUC <sub>0-120 min</sub> (mg·min/dL) |               |                               |                               |                            |
| Baseline                                 | n             | 34                            | 35                            |                            |
|                                          | Mean (95% CI) | 30,583.2 (28,936.4, 32,230.0) | 27,130.3 (25,442.2, 28,818.4) |                            |
| Week 16                                  | n             | 31                            | 34                            |                            |
|                                          | Mean (95% CI) | 25,051.0 (23,423.3, 26,678.6) | 28,500.9 (26,788.6, 30,213.2) | -6613.2 (-8838.7, -4387.6) |
| Preprandial C-peptide (ng/mL)            |               |                               |                               |                            |
| Baseline                                 | n             | 34                            | 35                            |                            |
|                                          | Mean (95% CI) | 0.93 (0.73, 1.12)             | 1.03 (0.83, 1.23)             |                            |
| Week 16                                  | n             | 31                            | 34                            |                            |
|                                          | Mean (95% CI) | 0.89 (0.69, 1.09)             | 1.11 (0.90, 1.32)             | -0.05 (-0.26, 0.17)        |

30-min postprandial C-peptide (ng/mL)

|          |               |                   |                   |                     |
|----------|---------------|-------------------|-------------------|---------------------|
| Baseline | n             | 34                | 35                |                     |
|          | Mean (95% CI) | 1.47 (1.22, 1.72) | 1.80 (1.49, 2.11) |                     |
| Week 16  | n             | 31                | 34                |                     |
|          | Mean (95% CI) | 1.35 (1.08, 1.62) | 1.86 (1.55, 2.16) | -0.11 (-0.38, 0.16) |

60-min postprandial C-peptide (ng/mL)

|          |               |                   |                   |                     |
|----------|---------------|-------------------|-------------------|---------------------|
| Baseline | n             | 34                | 35                |                     |
|          | Mean (95% CI) | 1.90 (1.59, 2.21) | 2.48 (2.09, 2.87) |                     |
| Week 16  | n             | 31                | 34                |                     |
|          | Mean (95% CI) | 1.90 (1.53, 2.26) | 2.60 (2.19, 3.00) | -0.03 (-0.39, 0.33) |

120-min postprandial C-peptide (ng/mL)

|          |               |                   |                   |                    |
|----------|---------------|-------------------|-------------------|--------------------|
| Baseline | n             | 34                | 35                |                    |
|          | Mean (95% CI) | 2.67 (2.30, 3.05) | 3.06 (2.61, 3.51) |                    |
| Week 16  | n             | 31                | 34                |                    |
|          | Mean (95% CI) | 2.92 (2.38, 3.46) | 3.09 (2.70, 3.47) | 0.31 (-0.20, 0.82) |

C-peptide AUC<sub>0-120 min</sub> (ng·min/mL)

|          |               |                 |                 |  |
|----------|---------------|-----------------|-----------------|--|
|          |               | 34              | 35              |  |
| Baseline | n             | 223.63 (189.83, | 272.83 (232.29, |  |
|          |               | 257.44)         | 313.37)         |  |
|          | Mean (95% CI) | 31              | 34              |  |
| Week 16  | n             | 226.84 (184.86, | 281.78 (241.54, |  |



|                                       |               |                      |                      |                      |
|---------------------------------------|---------------|----------------------|----------------------|----------------------|
|                                       |               | 268.82)              | 322.02)              |                      |
|                                       | Mean (95% CI) |                      |                      | 3.88 (-34.76, 42.53) |
| Preprandial glucagon (pg/mL)          |               |                      |                      |                      |
| Baseline                              | n             | 34                   | 35                   |                      |
|                                       | Mean (95% CI) | 118.2 (111.9, 124.6) | 121.0 (113.8, 128.2) |                      |
| Week 16                               | n             | 31                   | 34                   |                      |
|                                       | Mean (95% CI) | 113.9 (107.9, 119.8) | 112.9 (105.4, 120.5) | 5.3 (-3.9, 14.5)     |
| 30-min postprandial glucagon (pg/mL)  |               |                      |                      |                      |
| Baseline                              | n             | 34                   | 35                   |                      |
|                                       | Mean (95% CI) | 145.5 (136.4, 154.6) | 154.6 (142.0, 167.1) |                      |
| Week 16                               | n             | 31                   | 34                   |                      |
|                                       | Mean (95% CI) | 124.0 (116.6, 131.4) | 141.8 (130.1, 153.5) | -8.3 (-21.2, 4.6)    |
| 60-min postprandial glucagon (pg/mL)  |               |                      |                      |                      |
| Baseline                              | n             | 34                   | 35                   |                      |
|                                       | Mean (95% CI) | 142.5 (133.1, 151.9) | 155.1 (141.6, 168.6) |                      |
| Week 16                               | n             | 31                   | 34                   |                      |
|                                       | Mean (95% CI) | 124.1 (116.6, 131.6) | 139.0 (124.7, 153.3) | -1.1 (-14.4, 12.3)   |
| 120-min postprandial glucagon (pg/mL) |               |                      |                      |                      |
| Baseline                              | n             | 34                   | 35                   |                      |
|                                       | Mean (95% CI) | 130.0 (121.9, 138.2) | 131.8 (123.2, 140.4) |                      |

|                                               |               |                               |                               |                         |
|-----------------------------------------------|---------------|-------------------------------|-------------------------------|-------------------------|
| Week 16                                       | n             | 31                            | 34                            |                         |
|                                               | Mean (95% CI) | 116.1 (109.6, 122.6)          | 121.6 (112.5, 130.7)          | -3.1 (-14.2, 8.1)       |
| Glucagon AUC <sub>0-120 min</sub> (pg·min/mL) |               |                               |                               |                         |
| Baseline                                      | n             | 34                            | 35                            |                         |
|                                               | Mean (95% CI) | 16,453.2 (15498.0, 17,408.5)  | 17,385.0 (16,104.1, 18,665.9) |                         |
| Week 16                                       | n             | 31                            | 34                            |                         |
|                                               | Mean (95% CI) | 14,495.3 (13,736.6, 15,254.1) | 15,851.0 (14,540.5, 17,161.6) | -309.9 (-1598.1, 978.3) |

---

Data set: Full analysis set during the double-blind period

PPG, postprandial plasma glucose; CI, confidence interval; SE, standard error; AUC<sub>0-120 min</sub>, area under the concentration–time curve from 0 to 120 min

<sup>†</sup>Difference vs Placebo: Mean change for saxagliptin – Mean change for placebo

Supplemental Table 7. Subgroup analysis of clinical efficacy variables during the double-blind and open-label extension periods by age

| Variable (unit)           | Study period |               | Saxagliptin          | Placebo              | Difference vs placebo <sup>†</sup> (95% CI) |
|---------------------------|--------------|---------------|----------------------|----------------------|---------------------------------------------|
|                           |              |               | N = 113              | n = 115              |                                             |
| Double-blind period       |              |               |                      |                      |                                             |
| FPG (mg/dL)               |              |               |                      |                      |                                             |
| Age <65 years             | Baseline     | N             | 61                   | 57                   |                                             |
|                           |              | Mean (95% CI) | 174.9 (164.1, 185.7) | 167.8 (158.1, 177.6) |                                             |
|                           | Week 16      | N             | 57                   | 49                   |                                             |
|                           |              | Mean (95% CI) | 152.5 (143.1, 161.9) | 167.3 (156.8, 177.8) | −26.6 (−41.8, −11.4)                        |
| Age ≥65 years             | Baseline     | N             | 52                   | 58                   |                                             |
|                           |              | Mean (95% CI) | 154.0 (145.2, 162.8) | 154.3 (144.7, 163.8) |                                             |
|                           | Week 16      | n             | 48                   | 55                   |                                             |
|                           |              | Mean (95% CI) | 134.4 (126.9, 142.0) | 157.5 (147.8, 167.3) | −22.3 (−34.8, −9.8)                         |
| Fasting C-peptide (ng/mL) |              |               |                      |                      |                                             |
| Age <65 years             | Baseline     | n             | 61                   | 57                   |                                             |
|                           |              | Mean (95% CI) | 1.08 (0.92, 1.24)    | 1.16 (1.02, 1.30)    |                                             |
|                           | Week 16      | n             | 57                   | 49                   |                                             |
|                           |              | Mean (95% CI) | 0.97 (0.83, 1.11)    | 1.19 (1.03, 1.35)    | −0.14 (−0.30, 0.02)                         |
| Age ≥65 years             | Baseline     | n             | 52                   | 58                   |                                             |
|                           |              | Mean (95% CI) | 0.96 (0.81, 1.11)    | 0.95 (0.79, 1.11)    |                                             |
|                           | Week 16      | n             | 48                   | 55                   |                                             |
|                           |              | Mean (95% CI) | 1.02 (0.83, 1.20)    | 0.92 (0.76, 1.07)    | 0.07 (−0.06, 0.21)                          |

|                             |           |               |                         |                      |                   |
|-----------------------------|-----------|---------------|-------------------------|----------------------|-------------------|
| Fasting glucagon (pg/mL)    |           |               |                         |                      |                   |
| Age <65 years               | Baseline  | n             | 61                      | 57                   |                   |
|                             |           | Mean (95% CI) | 124.0 (118.3, 129.8)    | 125.4 (119.6, 131.2) |                   |
|                             | Week 16   | n             | 57                      | 49                   |                   |
|                             |           | Mean (95% CI) | 114.6 (110.0, 119.1)    | 116.4 (110.5, 122.4) | −0.4 (−8.6, 7.7)  |
| Age ≥65 years               | Baseline  | n             | 52                      | 58                   |                   |
|                             |           | Mean (95% CI) | 125.2 (118.9, 131.5)    | 122.5 (118.0, 126.9) |                   |
|                             | Week 16   | n             | 48                      | 55                   |                   |
|                             |           | Mean (95% CI) | 118.0 (111.6, 124.4)    | 114.4 (109.0, 119.8) | 0.0 (−7.7, 7.7)   |
| 1,5-AG (µg/mL)              |           |               |                         |                      |                   |
| Age <65 years               | Baseline  | n             | 61                      | 57                   |                   |
|                             |           | Mean (95% CI) | 3.64 (3.03, 4.25)       | 3.67 (3.00, 4.34)    |                   |
|                             | Week 16   | n             | 57                      | 49                   |                   |
|                             |           | Mean (95% CI) | 6.66 (5.16, 8.16)       | 3.37 (2.69, 4.05)    | 3.37 (2.16, 4.58) |
| Age ≥65 years               | Baseline  | n             | 52                      | 58                   |                   |
|                             |           | Mean (95% CI) | 4.58 (3.79, 5.36)       | 4.18 (3.53, 4.83)    |                   |
|                             | Week 16   | n             | 48                      | 55                   |                   |
|                             |           | Mean (95% CI) | 7.54 (6.32, 8.75)       | 4.00 (3.26, 4.74)    | 3.04 (2.28, 3.81) |
|                             |           |               | Saxagliptin→saxagliptin | Placebo→saxagliptin  |                   |
|                             |           |               | N = 113                 | N = 100              |                   |
| Double-blind period and     |           |               |                         |                      |                   |
| Open-label extension period |           |               |                         |                      |                   |
| FPG (mg/dL)                 |           |               |                         |                      |                   |
| Age <65 years               | Baseline* | n             | 61                      | 47                   |                   |
|                             |           | Mean (95% CI) | 174.9 (164.1, 185.7)    | 167.7 (156.7, 178.7) |                   |
|                             | Week 52   | n             | 51                      | 44                   |                   |

|                           |               |           |               |                      |                      |
|---------------------------|---------------|-----------|---------------|----------------------|----------------------|
| Fasting C-peptide (ng/mL) | Age ≥65 years | Baseline* | Mean (95% CI) | 148.3 (137.5, 159.0) | 155.8 (144.4, 167.2) |
|                           |               |           | n             | 52                   | 53                   |
|                           | Week 52       | Baseline* | Mean (95% CI) | 154.0 (145.2, 162.8) | 156.7 (146.7, 166.7) |
|                           |               |           | n             | 45                   | 44                   |
|                           |               | Week 52   | Mean (95% CI) | 145.6 (134.1, 157.0) | 143.1 (133.1, 153.1) |
|                           |               |           | n             | 45                   | 44                   |
| Fasting glucagon (pg/mL)  | Age <65 years | Baseline* | n             | 61                   | 47                   |
|                           |               |           | Mean (95% CI) | 1.08 (0.92, 1.24)    | 1.18 (1.02, 1.35)    |
|                           | Week 52       | Baseline* | n             | 51                   | 44                   |
|                           |               |           | Mean (95% CI) | 1.03 (0.85, 1.21)    | 1.29 (1.08, 1.50)    |
|                           |               | Week 52   | n             | 52                   | 53                   |
|                           |               |           | Mean (95% CI) | 0.96 (0.81, 1.11)    | 0.90 (0.74, 1.06)    |
| 1,5-AG (μg/mL)            | Age ≥65 years | Baseline* | n             | 52                   | 53                   |
|                           |               |           | Mean (95% CI) | 0.91 (0.77, 1.04)    | 0.90 (0.73, 1.08)    |
|                           | Week 52       | Baseline* | n             | 61                   | 47                   |
|                           |               |           | Mean (95% CI) | 124.0 (118.3, 129.8) | 116.1 (109.9, 122.4) |
|                           |               | Week 52   | n             | 51                   | 44                   |
|                           |               |           | Mean (95% CI) | 108.8 (103.5, 114.0) | 114.9 (106.5, 123.3) |
| 1,5-AG (μg/mL)            | Age <65 years | Baseline* | n             | 52                   | 53                   |
|                           |               |           | Mean (95% CI) | 125.2 (118.9, 131.5) | 114.9 (109.3, 120.4) |
|                           | Week 52       | Baseline* | n             | 45                   | 44                   |
|                           |               |           | Mean (95% CI) | 119.3 (110.7, 127.9) | 105.5 (99.4, 111.7)  |
|                           |               | Week 52   | n             | 45                   | 44                   |
|                           |               |           | Mean (95% CI) | 3.64 (3.03, 4.25)    | 3.30 (2.64, 3.97)    |

|               |           |               |                   |                   |
|---------------|-----------|---------------|-------------------|-------------------|
| Age ≥65 years | Baseline* | Mean (95% CI) | 6.00 (4.73, 7.28) | 5.75 (4.36, 7.14) |
|               |           | n             | 52                | 53                |
|               | Week 52   | Mean (95% CI) | 4.58 (3.79, 5.36) | 3.76 (3.19, 4.33) |
|               |           | n             | 45                | 44                |
|               |           | Mean (95% CI) | 6.49 (5.44, 7.55) | 6.11 (5.11, 7.11) |

---

Data set: Full analysis set during the double-blind period and full analysis set during the long-term period

FPG, fasting plasma glucose; 1,5-AG, 1,5-anhydroglucitol; CI, confidence interval

\*Baseline was defined as the start of saxagliptin: Week 0 in the saxagliptin→saxagliptin group; Week 16 in the placebo→saxagliptin group.

†Difference vs Placebo: Mean change for saxagliptin — Mean change for placebo

Supplemental Table 8. Subgroup analysis of the incidence of hypoglycemia and blood glucose decreased by insulin type

|                              | TEAEs        |             | Drug-related TEAEs |             |
|------------------------------|--------------|-------------|--------------------|-------------|
|                              | Saxagliptin  | Placebo     | Saxagliptin        | Placebo     |
| Premixed/Intermediate-acting | N = 82       | N = 80      | N = 82             | N = 80      |
| Long-acting                  | N = 35       | N = 35      | N = 35             | N = 35      |
| n (%)                        |              |             |                    |             |
| Double-blind period          |              |             |                    |             |
| TEAE by preferred term       |              |             |                    |             |
| Hypoglycemia                 |              |             |                    |             |
| Premixed/Intermediate-acting | 18 (22.0%)   | 15 (18.8%)  | 13 (15.9%)         | 13 (16.3%)  |
| Long-acting                  | 6 (17.1%)    | 2 (5.7%)    | 5 (14.3%)          | 2 (5.7%)    |
| Blood glucose decreased      |              |             |                    |             |
| Premixed/Intermediate-acting | 2 (2.4%)     | 0           | 1 (1.2%)           | 0           |
| Long-acting                  | 0            | 0           | 0                  | 0           |
|                              | Saxagliptin→ | Placebo→    | Saxagliptin→       | Placebo→    |
|                              | saxagliptin  | saxagliptin | saxagliptin        | saxagliptin |
| Premixed/Intermediate-acting | N = 82       | N = 69      | N = 82             | N = 69      |
| Long-acting                  | N = 35       | N = 34      | N = 35             | N = 34      |
| n (%)                        |              |             |                    |             |
| Double-blind period and      |              |             |                    |             |
| Open-label extension period* |              |             |                    |             |
| TEAE by preferred term       |              |             |                    |             |
| Hypoglycemia                 |              |             |                    |             |
| Premixed/Intermediate-acting | 26 (31.7%)   | 16 (23.2%)  | 21 (25.6%)         | 10 (14.5%)  |
| Long-acting                  | 10 (28.6%)   | 2 (5.9%)    | 6 (17.1%)          | 2 (5.9%)    |
| Blood glucose decreased      |              |             |                    |             |

|                              |          |          |         |          |
|------------------------------|----------|----------|---------|----------|
| Premixed/Intermediate-acting | 8 (9.8%) | 2 (2.9%) | 5(6.1%) | 1 (1.4%) |
| Long-acting                  | 0        | 1 (2.9%) | 0       | 1 (2.9%) |

---

Data set: Safety analysis set during double blind period and safety analysis set during the long-term period

TEAE, Treatment-emergent adverse event

\*Treatment duration: 52 weeks for saxagliptin→saxagliptin group (Week 0–52) and 36 weeks for placebo→saxagliptin group (Weeks 16–52).



Supplemental Table 9. Overall changes in body weight and vital signs throughout the study.

| Variable                           |           | Saxagliptin→saxagliptin<br>N = 117 | Placebo→saxagliptin<br>N = 115 |
|------------------------------------|-----------|------------------------------------|--------------------------------|
| Body weight (kg)                   |           |                                    |                                |
| Baseline                           | n         | 117                                | 115                            |
|                                    | Mean (SD) | 64.28 (10.87)                      | 66.61 (15.27)                  |
| Week 16                            | n         | 105                                | 106                            |
|                                    | Mean (SD) | 65.09 (11.15)                      | 66.31 (15.17)                  |
| Week 52                            | n         | 96                                 | 89                             |
|                                    | Mean (SD) | 65.02 (10.99)                      | 67.08 (16.32)                  |
| Systolic blood pressure<br>(mmHg)  |           |                                    |                                |
| Baseline                           | n         | 117                                | 115                            |
|                                    | Mean (SD) | 132.8 (16.5)                       | 133.3 (13.7)                   |
| Week 16                            | n         | 105                                | 106                            |
|                                    | Mean (SD) | 132.6 (15.1)                       | 135.0 (14.2)                   |
| Week 52                            | n         | 96                                 | 89                             |
|                                    | Mean (SD) | 131.8 (13.5)                       | 132.6 (14.6)                   |
| Diastolic blood pressure<br>(mmHg) |           |                                    |                                |
| Baseline                           | n         | 117                                | 115                            |
|                                    | Mean (SD) | 74.6 (10.6)                        | 74.9 (10.8)                    |
| Week 16                            | n         | 105                                | 106                            |
|                                    | Mean (SD) | 74.7 (9.8)                         | 75.4 (11.0)                    |
| Week 52                            | n         | 96                                 | 89                             |
|                                    | Mean (SD) | 75.2 (9.2)                         | 74.6 (10.4)                    |
| Pulse rate (beats/min)             |           |                                    |                                |

|                  |           |              |              |
|------------------|-----------|--------------|--------------|
| Baseline         | n         | 117          | 115          |
|                  | Mean (SD) | 74.2 (12.2)  | 78.0 (11.4)  |
| Week 16          | n         | 105          | 106          |
|                  | Mean (SD) | 73.1 (11.5)  | 75.8 (10.3)  |
| Week 52          | n         | 96           | 89           |
|                  | Mean (SD) | 73.8 (11.5)  | 75.0 (10.8)  |
| Temperature (°C) |           |              |              |
| Baseline         | n         | 117          | 115          |
|                  | Mean (SD) | 36.15 (0.40) | 36.14 (0.39) |
| Week 16          | n         | 105          | 106          |
|                  | Mean (SD) | 36.14 (0.41) | 36.13 (0.39) |
| Week 52          | n         | 96           | 89           |
|                  | Mean (SD) | 36.08 (0.50) | 36.15 (0.42) |

---

Data set: Safety analysis set during the long-term period.

SD, standard deviation

Baseline was defined as Week 0 in both groups.
